# Supplementary material for: Polyoxometalates with tunable third-order nonlinear optical and superbroadband optical limiting properties
Source: Royal Society of Chemistry journal article supplement (doi:10.1039/d2qi00899h), 2022-01-01
Supplement: d2qi00899h1.pdf [file d2qi00899h1.pdf]

## Supporting Information

### **Polyoxometalates with Tunable Third-order Nonlinear Optical and Superbroadband Optical Limiting Properties**

Long-Sheng Wang\*<sup>a,e</sup>, Yue Wang<sup>a,b</sup>, Chun-Lin Lv<sup>c</sup>, Chao Guo<sup>a</sup>, Fang-Yuan Xing<sup>b</sup>,  
Yu-Jia Dong<sup>a</sup>, Zheng Xie\*<sup>b</sup>, Shu-Yun Zhou<sup>b</sup> and Yong-Ge Wei\*<sup>d</sup>

<sup>a</sup> School of Material and Chemical Engineering, Hubei Provincial Key Laboratory of Green Materials for Light Industry, Hubei University of Technology, Hubei province, Wuhan, 430068, P.R. China. Email: [wls@mail.tsinghua.edu.cn](mailto:wls@mail.tsinghua.edu.cn)

<sup>b</sup> Key Laboratory of Photochemical Conversion and Optoelectronic Materials, Technical Institute of Physics and Chemistry, Chinese Academy of Sciences, Beijing, 100190, China. Email: [zhengxie@mail.ipc.ac.cn](mailto:zhengxie@mail.ipc.ac.cn)

<sup>c</sup> Department of Chemistry, School of Life and Environmental Sciences, Minzu University of China, Beijing, 100081, China.

<sup>d</sup> Key Lab of Organic Optoelectronics & Molecular Engineering of Ministry of Education, Department of Chemistry, School of Science, Tsinghua University, Beijing, 100084, China. Email: [yonggewei@mail.tsinghua.edu.cn](mailto:yonggewei@mail.tsinghua.edu.cn)

<sup>e</sup> State Key Laboratory of structural chemistry, Fujian Institute of Research on the Structure of Matter, Chinese Academy of Sciences, Fujian province, Fuzhou, 350002, China.

**Table S1** Crystal data collection and structure refinement parameters of  $V_1Mo_5$ ,  $V_8Mo_2$  and  $V_9Mo_1$ .

**Table S2** Selected bond lengths and bond angles of  $V_1Mo_5$ ,  $V_8Mo_2$  and  $V_9Mo_1$ .

**Table S3** BVS results of  $V_1Mo_5$ .

**Table S4** BVS results of  $V_8Mo_2$

**Table S5** BVS results of  $V_9Mo_1$ .

**Table S6** Inductively Coupled Plasma Mass Spectrometry (ICP-MS) of  $V_1Mo_5$ ,  $V_8Mo_2$  and  $V_9Mo_1$ .

**Figure S1-S3** Raman spectra of  $V_1Mo_5$ ,  $V_8Mo_2$  and  $V_9Mo_1$ .

**Figure S4** HR MS spectrum (positive region) of  $V_1Mo_5$ .

**Figure S5** HR MS spectrum (negative region) of  $V_1Mo_5$ .

**Table S7** Summary of HR MS results for  $V_1Mo_5$ .

**Figure S6** HR MS spectrum (positive mode) of  $V_8Mo_2$ .

**Figure S7** HR MS spectrum (negative mode) of  $V_8Mo_2$ .

**Table S8** Summary of GC-HRMS results for  $V_8Mo_2$ .

**Figure S8** HR MS spectrum (positive mode) of  $V_9Mo_1$ .

**Figure S9** HR MS spectrum (negative mode) of  $V_9Mo_1$ .

**Table S9** Summary of HR MS results for  $V_9Mo_1$ .

**Figure S10** XPS spectrum of  $V_1Mo_5$ .

**Figure S11** XPS spectrum of  $V_8Mo_2$ .

**Figure S12** XPS spectrum of  $V_9Mo_1$ .

**Figure S13** SEM images of  $V_1Mo_5$ ,  $V_8Mo_2$  and  $V_9Mo_1$ .

**Figure S14** TEM images of  $V_8Mo_2$ .

**Figure S15** The closed-aperture Z-scan result of  $V_1Mo_5$  and  $V_8Mo_2$ .

**Table S10** NLO coefficients of  $V_1Mo_5$ ,  $V_8Mo_2$ ,  $V_9Mo_1$  and  $V_{10}$  in propanetriol at the laser of 532 and 1064 nm.

#### **Calculation Details of NLO Coefficients**

**Figure S11.** TG and DTG curves of  $V_1Mo_5$ ,  $V_8Mo_2$  and  $V_9Mo_1$ .

**Table S1.** Crystal data collection and structure refinement parameters of **V<sub>1</sub>Mo<sub>5</sub>**, **V<sub>8</sub>Mo<sub>2</sub>** and **V<sub>9</sub>Mo<sub>1</sub>**.

|                                                  | <b>V<sub>1</sub>Mo<sub>5</sub></b>                                                | <b>V<sub>8</sub>Mo<sub>2</sub></b>                                                             | <b>V<sub>9</sub>Mo<sub>1</sub></b>                                               |
|--------------------------------------------------|-----------------------------------------------------------------------------------|------------------------------------------------------------------------------------------------|----------------------------------------------------------------------------------|
| Empirical formula                                | C <sub>48</sub> H <sub>108</sub> N <sub>3</sub> O <sub>19</sub> Mo <sub>5</sub> V | C <sub>68</sub> H <sub>150</sub> N <sub>6</sub> O <sub>28</sub> Mo <sub>2</sub> V <sub>8</sub> | C <sub>68</sub> H <sub>151</sub> N <sub>6</sub> O <sub>28</sub> MoV <sub>9</sub> |
| Formula weight                                   | 1562.015                                                                          | 2099.34                                                                                        | 2055.34                                                                          |
| Crystal description                              | yellow, block                                                                     | yellow, block                                                                                  | orange, block                                                                    |
| Temperature(K)                                   | 298(2)                                                                            | 150(2)                                                                                         | 150(2)                                                                           |
| Wavelength(Å)                                    | 0.71073                                                                           | 0.71073                                                                                        | 0.71073                                                                          |
| Cryst. syst.                                     | Monoclinic                                                                        | Triclinic                                                                                      | Triclinic                                                                        |
| Space group                                      | C2/c                                                                              | P-1                                                                                            | P-1                                                                              |
| <i>a</i> (Å)                                     | 30.146(6)                                                                         | 16.747(3)                                                                                      | 16.748(3)                                                                        |
| <i>b</i> (Å)                                     | 18.397(4)                                                                         | 17.427(4)                                                                                      | 17.445(4)                                                                        |
| <i>c</i> (Å)                                     | 27.281(6)                                                                         | 17.929(4)                                                                                      | 17.931(4)                                                                        |
| $\alpha$ (°)                                     | 90                                                                                | 74.18(3)                                                                                       | 74.20(3)                                                                         |
| $\beta$ (°)                                      | 72.366(3)                                                                         | 67.43(3)                                                                                       | 67.40(3)                                                                         |
| $\gamma$ (°)                                     | 90                                                                                | 74.13(3)                                                                                       | 74.19(3)                                                                         |
| <i>V</i> (Å <sup>3</sup> )                       | 13987(5)                                                                          | 4564.1(17)                                                                                     | 4570.1(17)                                                                       |
| <i>Z</i>                                         | 4                                                                                 | 2                                                                                              | 2                                                                                |
| $\rho_{\text{calc}}/\text{g}\cdot\text{cm}^{-3}$ | 1.484                                                                             | 1.528                                                                                          | 1.493                                                                            |
| $2\theta$ range /deg                             | 0.993 - 27.48                                                                     | 0.978 - 25.40                                                                                  | 1.34 - 26.37                                                                     |
| $\mu$ (mm <sup>-1</sup> )                        | 1.058                                                                             | 1.118                                                                                          | 1.081                                                                            |
| <i>F</i> (000)                                   | 6416                                                                              | 2184                                                                                           | 2146                                                                             |
| Reflns. collec.                                  | 62931                                                                             | 44966                                                                                          | 45574                                                                            |
| Data/Parameters                                  | 15897/694                                                                         | 16444/1106                                                                                     | 18623/1016                                                                       |
| R(int)                                           | 0.0310                                                                            | 0.0640                                                                                         | 0.0450                                                                           |
| R <sup>a</sup> /R <sub>w</sub> <sup>b</sup>      | 0.0430/ 0.1449                                                                    | 0.0720/0.2114                                                                                  | 0.0728/ 0.1893                                                                   |
| GOF ( <i>F</i> <sub>2</sub> )                    | 1.075                                                                             | 1.023                                                                                          | 1.081                                                                            |
| CCDC NO.                                         | 2080750                                                                           | 2080751                                                                                        | 2080752                                                                          |

**Table S2.** Selected bond lengths and bond angles of **V<sub>1</sub>Mo<sub>5</sub>**, **V<sub>8</sub>Mo<sub>2</sub>** and **V<sub>9</sub>Mo<sub>1</sub>**.

|                        | <b>V<sub>1</sub>Mo<sub>5</sub></b> | (TBA) <sub>2</sub> [Mo <sub>6</sub> O <sub>19</sub> ] |
|------------------------|------------------------------------|-------------------------------------------------------|
| M=O(Å)                 | 1.664(3) ~ 1.683(3)                | 1.674(3) ~ 1.680(3)                                   |
| M-μ <sub>2</sub> -O(Å) | 1.875(2) ~ 1.957(3)                | 1.904(3) ~ 1.942(3)                                   |
| M-μ <sub>6</sub> -O(Å) | 2.296(2) ~ 2.3088(5)               | 2.307(2) ~ 2.326(2)                                   |
| M···M(Å)               | 3.239 ~ 3.274                      | 3.269 ~ 3.285                                         |

|                        | <b>V<sub>8</sub>Mo<sub>2</sub></b> | <b>V<sub>9</sub>Mo<sub>1</sub></b> | (TBA) <sub>3</sub> [H <sub>3</sub> V <sub>10</sub> O <sub>28</sub> ] |
|------------------------|------------------------------------|------------------------------------|----------------------------------------------------------------------|
| V=O(Å)                 | 1.596(3) ~ 1.603(3)                | 1.591(3) ~ 1.601(4)                | 1.595(6) ~ 1.623(4)                                                  |
| M=O(Å)                 | 1.606(4) ~ 1.615(4)                | 1.607(4) ~ 1.625(4)                | —                                                                    |
| M-μ <sub>2</sub> -O(Å) | 1.803(3) ~ 1.897(3)                | 1.804(3) ~ 2.000(3)                | 1.814(3) ~ 2.030(2)                                                  |
| M-μ <sub>3</sub> -O(Å) | 1.682(3) ~ 1.689(3)                | 1.680(3) ~ 1.691(3)                | 1.939(9) ~ 2.098(5)                                                  |
| M-μ <sub>3</sub> -O(Å) | 1.921(3) ~ 2.024(3)                | 2.023(3) ~ 2.054(3)                | —                                                                    |
| M-μ <sub>6</sub> -O(Å) | 2.089(3) ~ 2.339(3)                | 2.093(3) ~ 2.341(3)                | 2.064(1) ~ 2.349(3)                                                  |
| M···M(Å)               | 3.0642(12)~3.1989(11)              | 3.0627(11)~3.1557(17)              | 3.072(5)~3.247(9)                                                    |

**Table S3.** BVS results of  $V_1Mo_5$ .

| Compound     | $V_1Mo_5$ |      |      |              |      |      |
|--------------|-----------|------|------|--------------|------|------|
|              | VMo1      | VMo2 | VMo3 | VMo4         | VMo5 | VMo6 |
| <b>O(1)</b>  | 1.87      |      |      | <b>O(11)</b> | 1.92 |      |
| <b>O(2)</b>  |           | 1.9  |      | <b>O(12)</b> |      | 1.83 |
| <b>O(3)</b>  |           |      | 1.99 | <b>O(13)</b> |      | 1.88 |
| <b>O(4)</b>  | 0.86      | 0.81 |      | <b>O(14)</b> | 0.81 | 0.94 |
| <b>O(5)</b>  | 0.93      |      | 0.78 | <b>O(15)</b> | 0.84 | 0.91 |
| <b>O(6)</b>  | 0.82      |      | 0.93 | <b>O(16)</b> | 0.91 | 0.86 |
| <b>O(7)</b>  | 0.80      | 0.94 |      | <b>O(17)</b> | 0.93 | 0.8  |
| <b>O(8)</b>  |           | 0.77 | 0.97 | <b>O(18)</b> |      | 0.84 |
| <b>O(9)</b>  |           | 0.99 | 0.77 | <b>O(19)</b> |      | 0.86 |
| <b>O(10)</b> | 0.29      | 0.29 | 0.30 | <b>O(20)</b> |      | 0.89 |
|              |           |      |      | <b>O(21)</b> | 0.30 | 0.30 |
| $\Sigma s$   | 5.57      | 5.7  | 5.74 |              | 5.71 | 5.63 |
|              |           |      |      |              |      | 5.66 |

**Table S4.** BVS results of  $V_8Mo_2$ 

| Compound     | $V_8Mo_2$ |      |      |      |              |              |      |      |      |       |
|--------------|-----------|------|------|------|--------------|--------------|------|------|------|-------|
|              | V1        | V2   | VMo3 | VMo4 | VMo5         | V6           | V7   | VMo8 | VMo9 | VMo10 |
| <b>O(1)</b>  | 1.78      |      |      |      | <b>O(15)</b> | 1.76         |      |      |      | 0.49  |
| <b>O(2)</b>  |           | 1.78 |      |      | <b>O(16)</b> |              | 1.74 |      |      |       |
| <b>O(3)</b>  |           |      | 1.98 |      | <b>O(17)</b> |              |      | 1.95 |      |       |
| <b>O(4)</b>  |           |      |      | 2.02 | <b>O(18)</b> |              |      |      | 2    |       |
| <b>O(5)</b>  | 0.89      | 0.95 |      |      | <b>O(19)</b> | 0.89         | 0.96 |      |      |       |
| <b>O(6)</b>  | 0.75      |      | 0.89 |      | 0.47         | <b>O(20)</b> | 0.65 |      | 0.9  |       |
| <b>O(7)</b>  | 0.78      |      |      | 0.92 |              | <b>O(21)</b> | 0.85 |      | 0.95 |       |
| <b>O(8)</b>  | 0.55      |      |      |      | 1.55         | <b>O(22)</b> | 0.54 |      |      | 1.53  |
| <b>O(9)</b>  |           | 0.75 | 1.08 |      |              | <b>O(23)</b> |      | 0.69 | 1.07 |       |
| <b>O(10)</b> |           | 0.5  |      |      | 1.57         | <b>O(24)</b> |      | 0.83 |      | 1.03  |
| <b>O(11)</b> |           | 0.76 |      | 1.07 |              | <b>O(25)</b> |      | 0.54 |      | 1.55  |
| <b>O(12)</b> |           |      | 0.57 | 0.62 | 0.77         | <b>O(26)</b> |      |      | 0.57 | 0.63  |
| <b>O(13)</b> | 0.26      | 0.26 | 0.32 | 0.3  | 0.48         | <b>O(27)</b> | 0.26 | 0.27 | 0.31 | 0.29  |
| <b>O(14)</b> |           |      | 0.63 | 0.58 | 0.73         | <b>O(28)</b> |      |      | 0.61 | 0.63  |
| $\Sigma s$   | 5.01      | 5    | 5.47 | 5.51 | 5.57         |              | 4.95 | 5.03 | 5.41 | 5.53  |
|              |           |      |      |      |              |              |      |      |      | 5.49  |

**Table S5.** BVS results of **V<sub>9</sub>Mo<sub>1</sub>**.

| Compound     | <b>V<sub>9</sub>Mo<sub>1</sub></b> |      |      |      |      |              |      |      |      |      |  |
|--------------|------------------------------------|------|------|------|------|--------------|------|------|------|------|--|
|              | V1                                 | V2   | VMo3 | VMo4 | V5   | V6           | V7   | VMo8 | VMo9 | V10  |  |
| <b>O(1)</b>  | 1.8                                |      |      |      |      | <b>O(21)</b> | 1.76 |      |      | 0.44 |  |
| <b>O(2)</b>  |                                    | 1.81 |      |      |      | <b>O(22)</b> |      | 1.74 |      |      |  |
| <b>O(3)</b>  |                                    |      | 1.9  |      |      | <b>O(23)</b> |      |      | 1.82 |      |  |
| <b>O(4)</b>  |                                    |      |      | 1.93 |      | <b>O(24)</b> |      |      |      | 1.87 |  |
| <b>O(5)</b>  | 0.88                               | 0.95 |      |      |      | <b>O(25)</b> | 0.9  | 0.93 |      |      |  |
| <b>O(6)</b>  | 0.74                               |      | 0.84 |      | 0.44 | <b>O(26)</b> | 0.64 |      | 0.86 |      |  |
| <b>O(7)</b>  | 0.78                               |      |      | 0.91 |      | <b>O(27)</b> | 0.88 |      |      | 0.9  |  |
| <b>O(8)</b>  | 0.54                               |      |      |      | 1.35 | <b>O(28)</b> | 0.53 |      |      | 1.33 |  |
| <b>O(9)</b>  |                                    | 0.76 | 1.02 |      |      | <b>O(29)</b> |      | 0.68 | 1.05 |      |  |
| <b>O(10)</b> |                                    | 0.76 |      | 1.02 |      | <b>O(30)</b> |      | 0.76 |      | 1.01 |  |
| <b>O(11)</b> |                                    | 0.5  |      |      | 1.36 | <b>O(31)</b> |      | 0.53 |      | 1.38 |  |
| <b>O(12)</b> |                                    |      | 0.55 | 0.61 | 0.7  | <b>O(32)</b> |      |      | 0.56 | 0.61 |  |
| <b>O(13)</b> |                                    |      | 0.64 | 0.56 | 0.67 | <b>O(33)</b> |      |      | 0.61 | 0.6  |  |
| <b>O(14)</b> | 0.27                               | 0.26 | 0.32 | 0.3  | 0.45 | <b>O(34)</b> | 0.26 | 0.28 | 0.31 | 0.29 |  |

**Table S6.** Inductively Coupled Plasma Mass Spectrometry (ICP-MS) of **V<sub>1</sub>Mo<sub>5</sub>**, **V<sub>8</sub>Mo<sub>2</sub>** and **V<sub>9</sub>Mo<sub>1</sub>**. (The atom number ratio of V and Mo in vanadomolybdic acid for ICP measurement)

| Sample                             | Concentration/M <sub>Mo</sub> (ppm) | Concentration/M <sub>V</sub> (ppm) | Atomic number ratio V/Mo |
|------------------------------------|-------------------------------------|------------------------------------|--------------------------|
| <b>V<sub>1</sub>Mo<sub>5</sub></b> | 0.099                               | 0.020                              | 0.20                     |
| <b>V<sub>8</sub>Mo<sub>2</sub></b> | 0.014                               | 0.056                              | 4.00                     |
| <b>V<sub>9</sub>Mo<sub>1</sub></b> | 0.012                               | 0.111                              | 9.25                     |

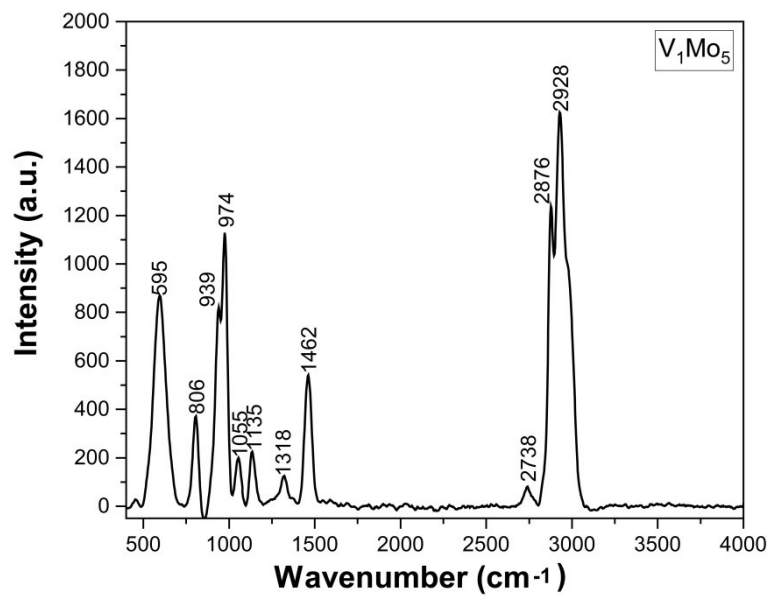

**Figure S1.** Raman spectrum of  $V_1Mo_5$ .

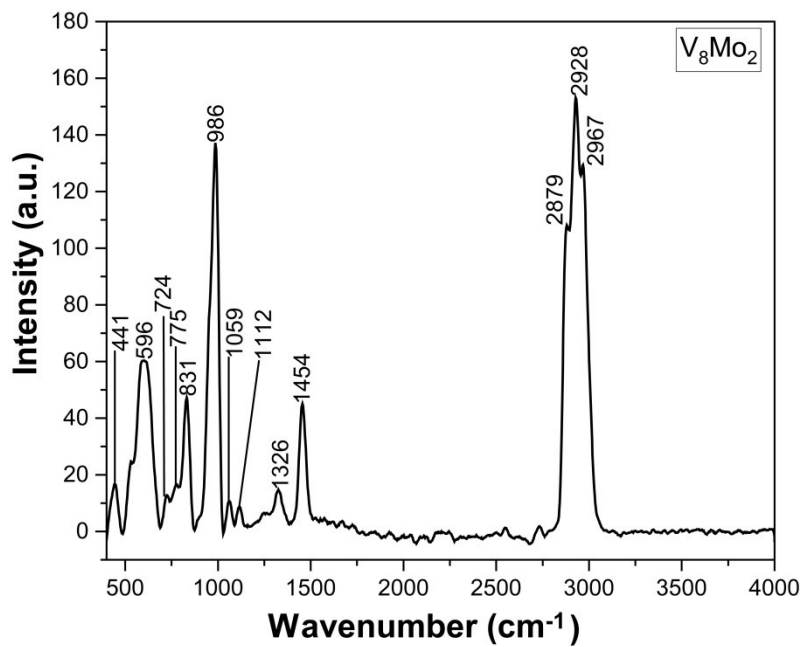

**Figure S2.** Raman spectrum of  $V_8Mo_8$ .

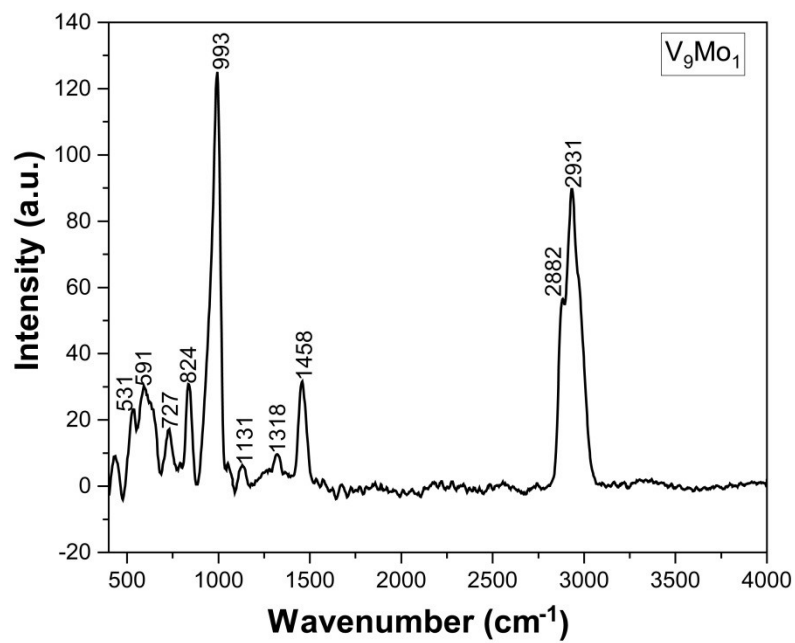

Figure S3. Raman spectrum of  $V_9Mo_1$ .



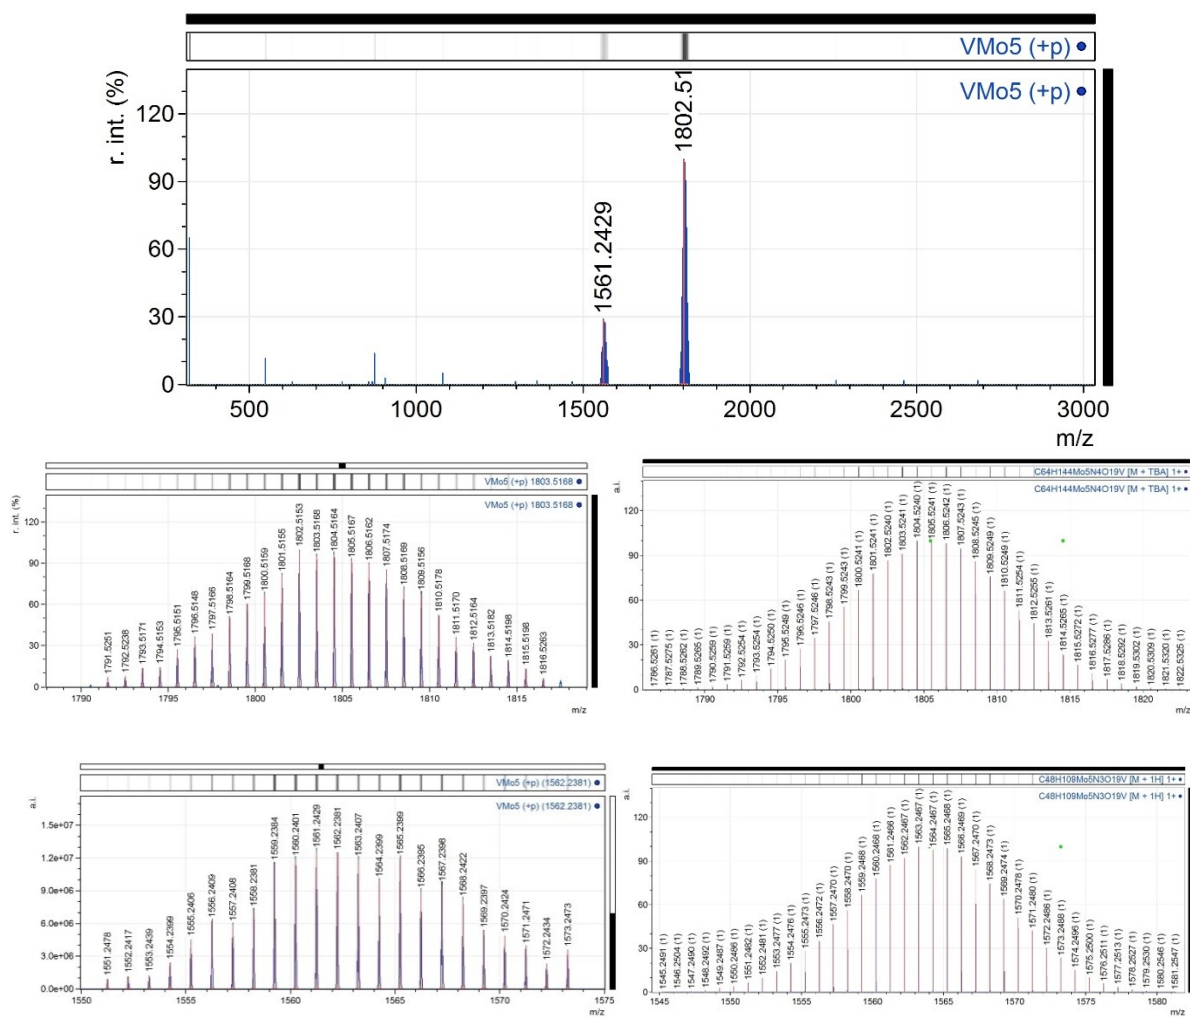

**Figure S4.** GC-HRMS spectrum (positive region) of  $V_1Mo_5$ : 1561.2429 for  $\{M + 1H\}^{1+}$ , calcd. 1562.2467; 1803.5168 for  $\{M + 1TBA\}^{1+}$ , calcd. 1803.5241.

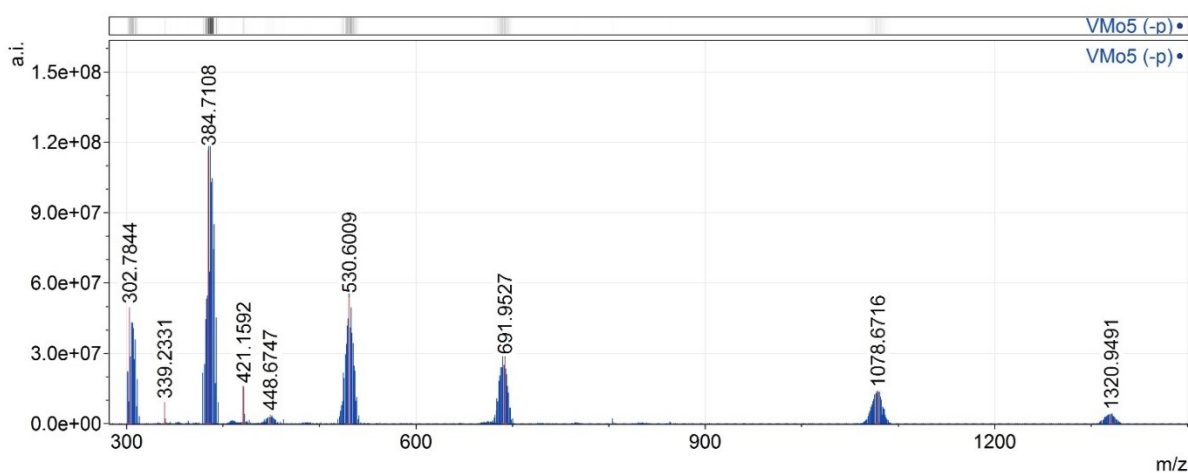

**Figure S5.** GC-HRMS spectrum (negative region) of  $V_1Mo_5$ : 1320.9491 for  $\{M - TBA\}^{1-}$ ; calcd. 1320.946; 1078.6716 for  $\{M - 2TBA + H\}^{1-}$ ; calcd. 1078.669.

**Table S7** Summary of HR MS results of  $V_1Mo_5$ .

| Negative mode of HRMS for $V_1Mo_5$ |                |                                                       |        |              |
|-------------------------------------|----------------|-------------------------------------------------------|--------|--------------|
| m/z                                 | Calculated m/z | Assigned Species                                      | Charge | Notes        |
| 302.7844                            | 302.784        | {HMo <sub>2</sub> O <sub>7</sub> } <sup>1-</sup>      | -1     | fragment     |
| 384.7108                            | 384.710        | {VMo <sub>2</sub> O <sub>9</sub> } <sup>1-</sup>      | -1     | fragment     |
| 421.1592                            | 426.68         | {Mo <sub>3</sub> O <sub>11</sub> } <sup>1-</sup>      | -1     | fragment     |
| 448.6747                            | 448.674        | {HMo <sub>3</sub> O <sub>10</sub> } <sup>1-</sup>     | -1     | fragment     |
| 530.6009                            | 530.600        | {VMo <sub>3</sub> O <sub>12</sub> } <sup>1-</sup>     | -1     | fragment     |
| 691.9527                            | 691.951        | {TBA(Mo <sub>3</sub> O <sub>10</sub> )} <sup>1-</sup> | -1     | fragment     |
| 1078.6716                           | 1078.669       | {M- 2TBA + H} <sup>1-</sup>                           | -1     | molecule ion |
| 1320.9491                           | 1320.946       | {M- TBA} <sup>1-</sup>                                | -1     | molecule ion |
|                                     |                |                                                       |        |              |
| Positive mode of HRMS for $V_1Mo_5$ |                |                                                       |        |              |
| 1564.2419                           | 1564.2467      | {M + 1H} <sup>1+</sup>                                | +1     | molecule ion |
| 1806.5134                           | 1806.5242      | {M + 1TBA} <sup>1+</sup>                              | +1     | molecule ion |

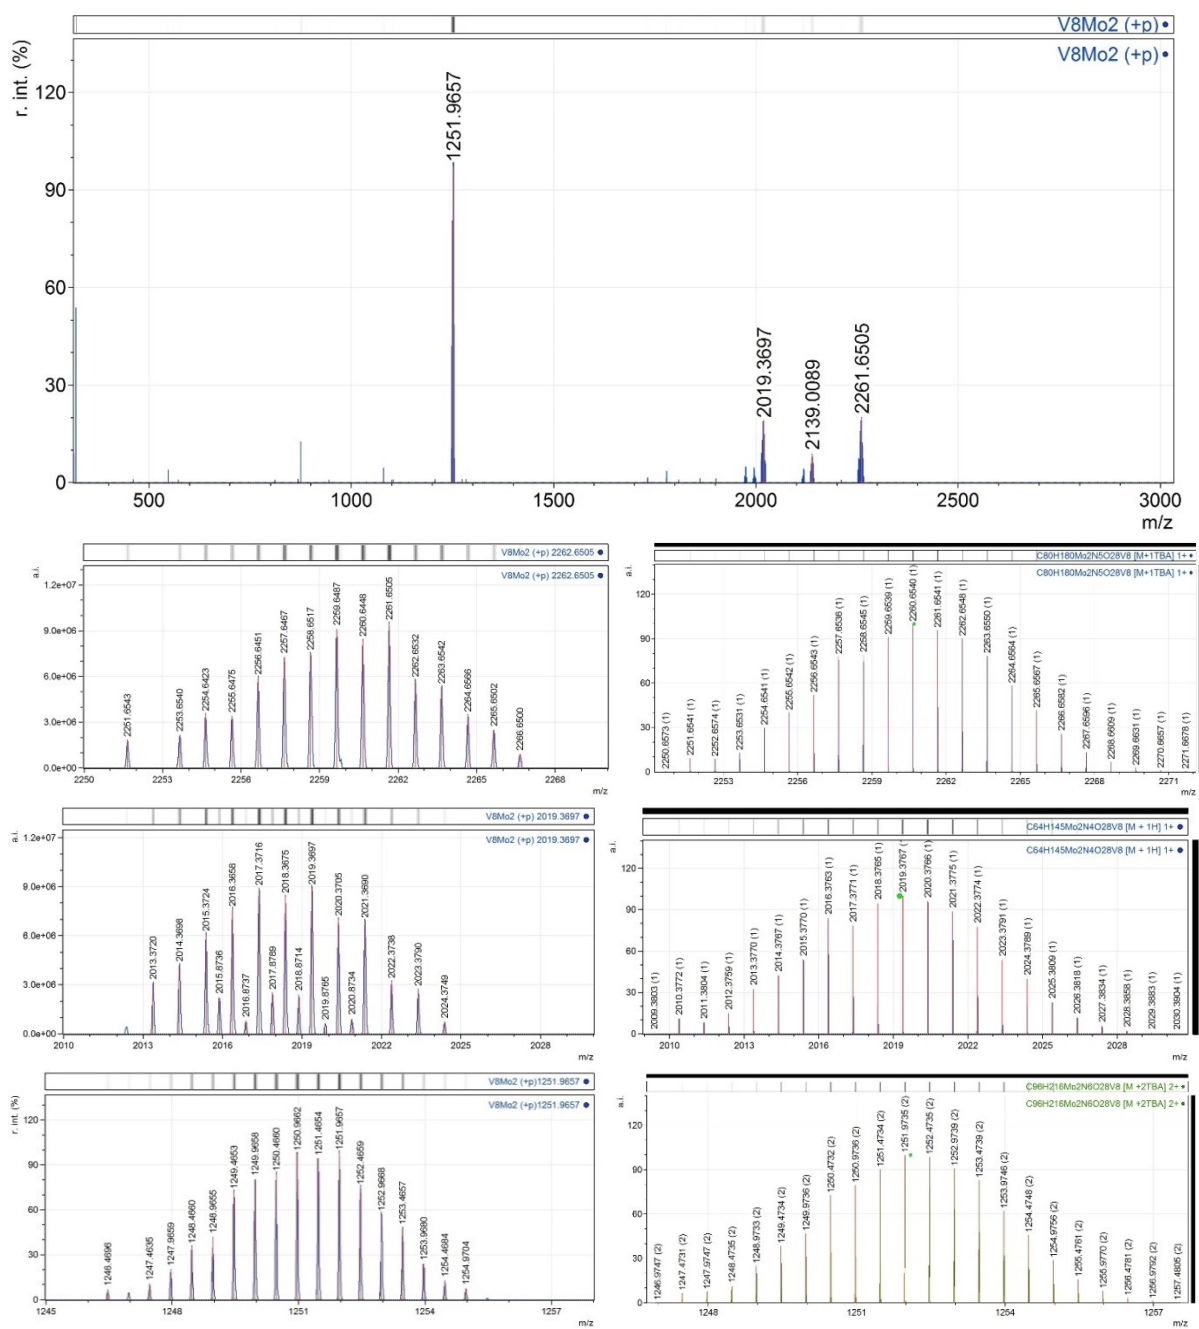

**Figure S6.** HRMS spectrum (positive mode) of  $V_8Mo_2$ : 1250.9656 for  $\{M + 2TBA\}^{2+}$ , calcd. 1250.9736; 2018.3716 for  $\{M + 1H\}^{1+}$ , calcd. 2018.3765; 2261.6596 for  $\{M + 1TBA\}^{1+}$ ; calcd. 2261.6541.

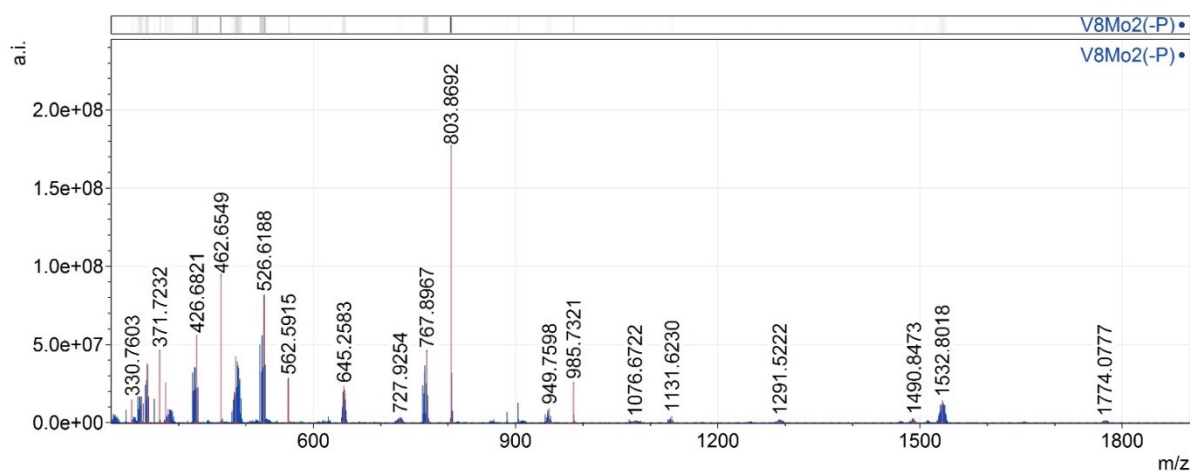

**Figure S7.** HRMS spectrum (negative mode) of  $V_8Mo_2$ : 1774.0777 for  $\{M - TBA\}^{1-}$ , calcd. 1774.076; 1532.8018 for  $\{M - 2TBA + H\}^{1-}$ , calcd. 1532.799; 1291.5122 for  $\{M - 3TBA + 2H\}^{1-}$ , calcd. 1291.522.

**Table S8** Summary of HR MS results for  $V_8Mo_2$ .

| HR MS Negative mode of $V_8Mo_2$ |                |                               |        |              |
|----------------------------------|----------------|-------------------------------|--------|--------------|
| m/z                              | Calculated m/z | Assigned Species              | Charge | Notes        |
| 334.7561                         | 334.755        | $\{HV_2MoO_9\}^{1-}$          | -1     | fragment     |
| 384.7107                         | 384.710        | $\{VMo_2O_9\}^{1-}$           | -1     | fragment     |
| 426.6821                         | 426.681        | $\{V_3MoO_{11}\}^{1-}$        | -1     | fragment     |
| 462.6549                         | 462.654        | $\{V_5O_{13}\}^{1-}$          | -1     | fragment     |
| 484.6474                         | 484.646        | $\{HV_2Mo_2O_{12}\}$          | -1     | fragment     |
| 526.6188                         | 526.625        | $\{M - 4TBA + 2H\}^{2-}$      | -2     | molecule ion |
| 645.2583                         | 646.264        | $\{M - 3TBA + H\}^{2-}$       | -2     | molecule ion |
| 766.3977                         | 766.430        | $\{V_5Mo_2O_{20}\}^{1-}$      | -1     | fragment     |
| 767.8967                         | 767.903        | $\{M - 2TBA\}^{2-}$           | -1     | molecule ion |
| 867.8346                         | 867.366        | $\{HV_6Mo_2O_{23}\}^{1-}$     | -1     | fragment     |
| 949.7598                         | 949.463        | $\{HV_7Mo_2O_{25}\}^{1-}$     | -1     | fragment     |
| 1076.6722                        | 1076.226       | $\{M - 4TBA + 2H + Na\}^{1-}$ | -1     | molecule ion |
| 1291.5122                        | 1291.522       | $\{M - 3TBA + 2H\}^{1-}$      | -1     | molecule ion |
| 1532.8018                        | 1532.799       | $\{M - 2TBA + H\}^{1-}$       | -1     | molecule ion |
| 1774.0777                        | 1774.076       | $\{M - TBA\}^{1-}$            | -1     | molecule ion |
| HR MS positive mode of $V_8Mo_2$ |                |                               |        |              |
| m/z                              | Calculated m/z | Assigned Species              | Charge | Notes        |
| 1250.9656                        | 1250.9736      | $\{M + 2TBA\}^{2+}$           | +2     | molecule ion |
| 2018.3716                        | 2018.3765      | $\{M + 1H\}^{1+}$             | +1     | molecule ion |
| 2261.6596                        | 2261.6541      | $\{M + 1TBA\}^{1+}$           | +1     | molecule ion |

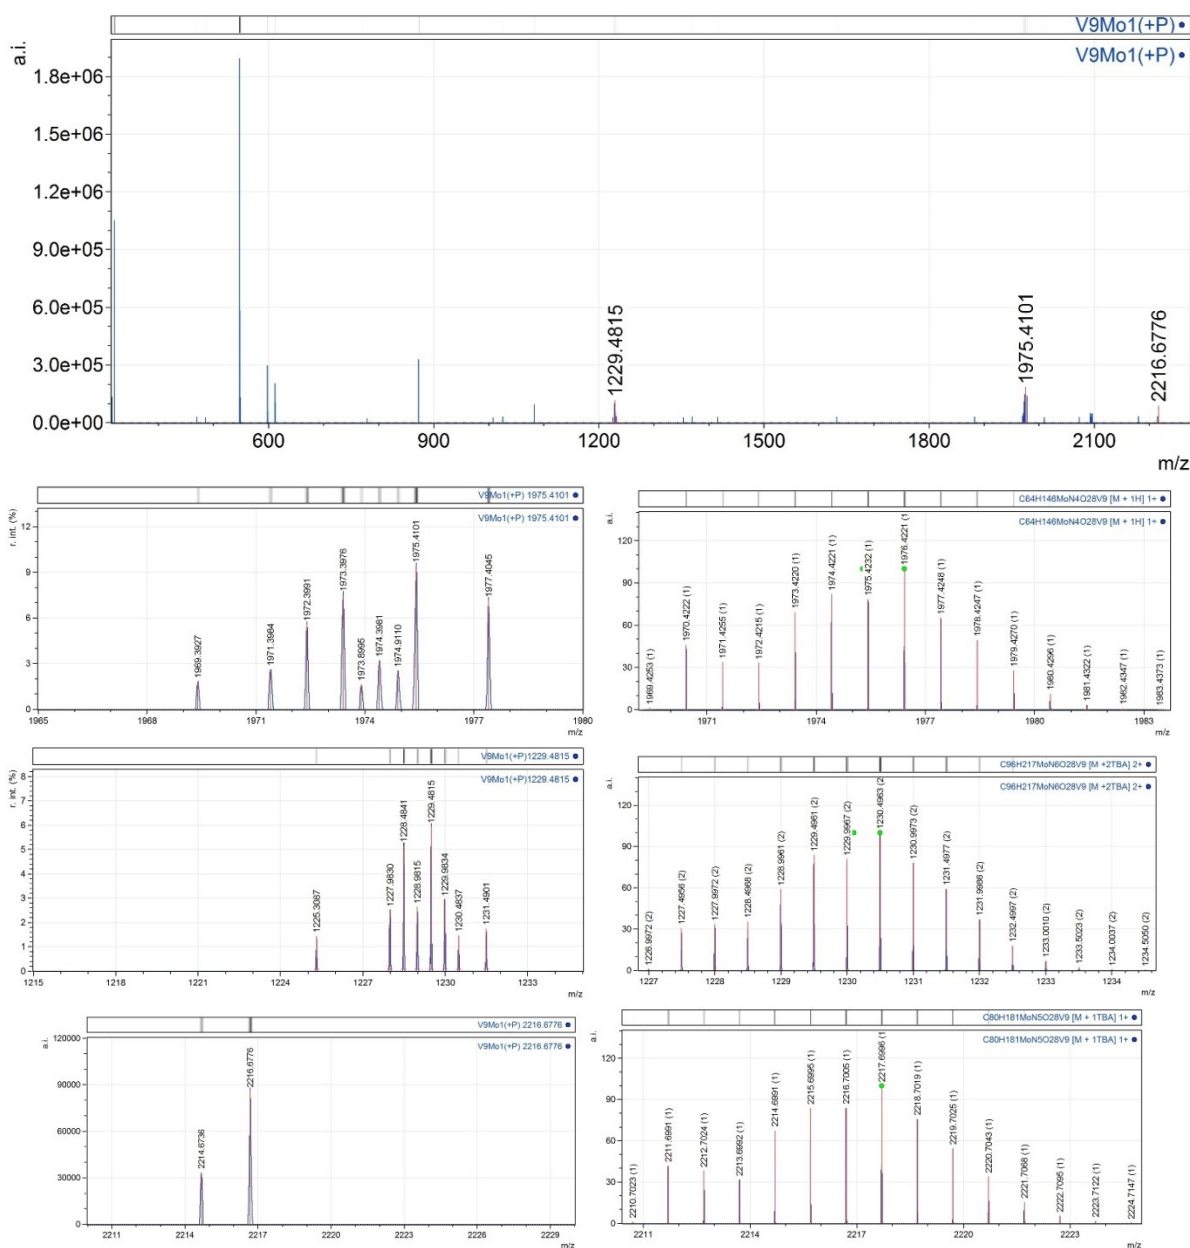

**Figure S8.** HR MS spectrum (positive mode) of  $V_9Mo_1$ : 1229.4815 for  $\{M + 2TBA\}^{2+}$ , calcd. 1229.1961; 1975.4501 for  $\{M + H\}^+$ , calcd. 1975.4231; 2216.6776 for  $\{M + TBA\}^+$ , calcd. 2216.7005.

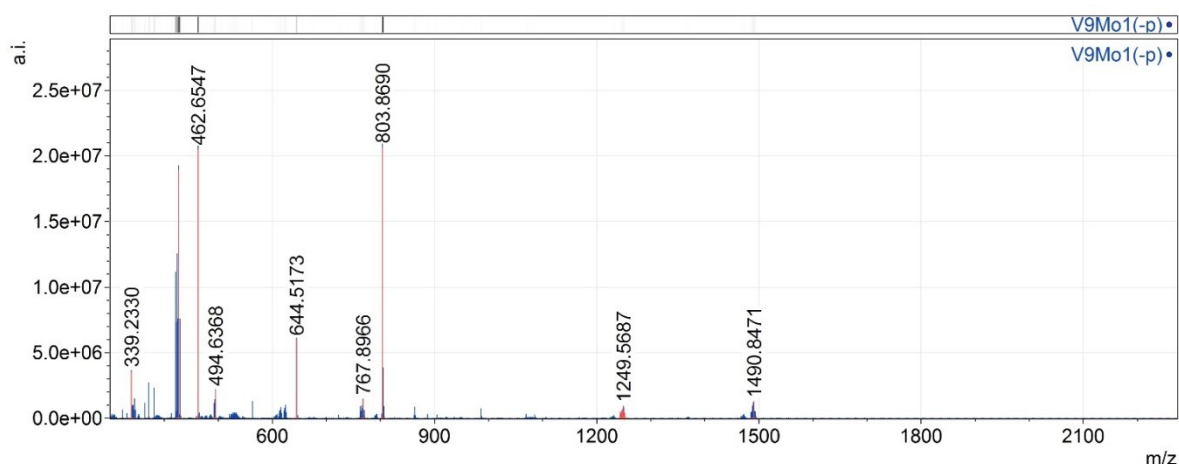

**Figure S9.** HR MS spectrum (negative mode) of  $V_9Mo_1$ : 1490.8471 for  $\{M-2TBA+H\}^{1-}$ , calcd. 1490.8485; 1249.5687 for  $\{M-3TBA+2H\}^{1-}$ , calcd. 1249.5673.

**Table S9** Summary of HR MS results for  $V_9Mo_1$ .

| HR MS Negative mode of $V_9Mo_1$ |                |                        |        |              |
|----------------------------------|----------------|------------------------|--------|--------------|
| m/z                              | Calculated m/z | Assigned Species       | Charge | Notes        |
| 339.2330                         | 339.760        | $\{HV_2MoO_9\}^{1-}$   | -1     | ragment      |
| 426.6818                         | 426.68         | $\{V_3MoO_{11}\}^{1-}$ | -1     | fragment     |
| 462.6547                         | 462.65         | $\{V_5O_{13}\}^{1-}$   | -1     | fragment     |
| 494.6368                         | 494.628        | $\{HV_4MoO_{12}\}$     | -1     | fragment     |
| 644.5173                         | 644.516        | $\{V_7O_{18}\}^{1-}$   | -1     | fragment     |
| 1249.5687                        | 1249.5673      | $\{M-3TBA+2H\}^{1-}$   | -1     | molecule ion |
| 1490.8471                        | 1490.8485      | $\{M-2TBA+H\}^{1-}$    | -1     | molecule ion |
| HR MS Negative mode of $V_9Mo_1$ |                |                        |        |              |
| m/z                              | Calculated m/z | Assigned Species       | Charge | Notes        |
| 1229.4815                        | 1229.1961      | $\{M+2TBA\}^{2+}$      | +2     | molecule ion |
| 1975.4501                        | 1975.4231      | $\{M+H\}^{1+}$         | +1     | molecule ion |
| 2216.6776                        | 2216.7005      | $\{M+TBA\}^{1+}$       | +1     | molecule ion |

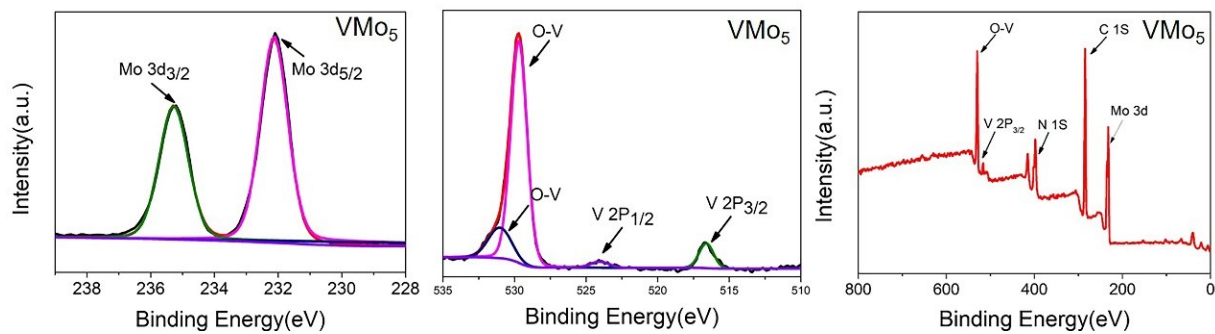

**Figure S10.** XPS spectrum of  $V_1Mo_5$ .

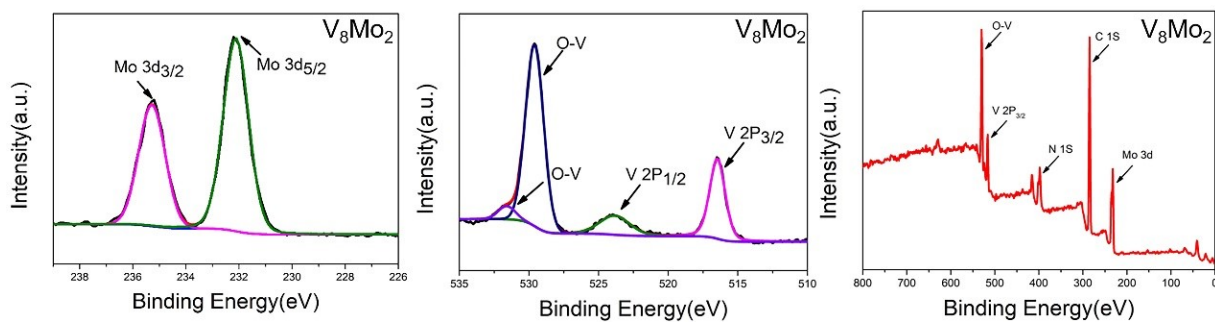

**Figure S11.** XPS spectrum of  $V_8Mo_2$ .

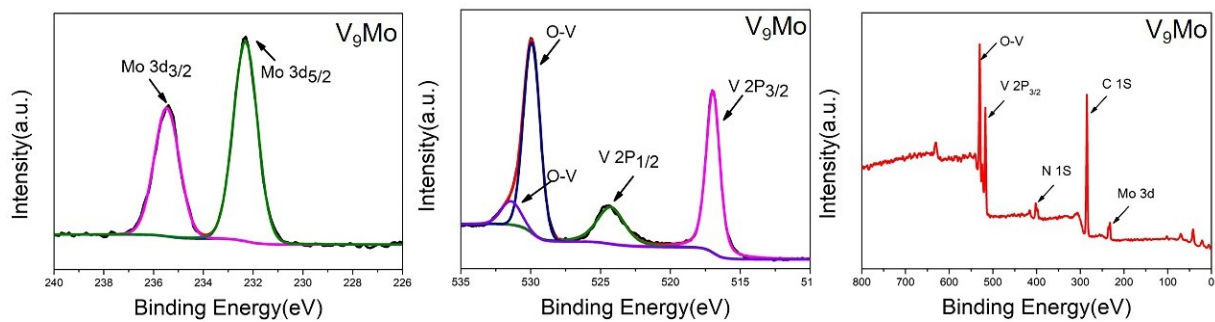

**Figure S12.** XPS spectrum of  $V_9Mo_1$ .

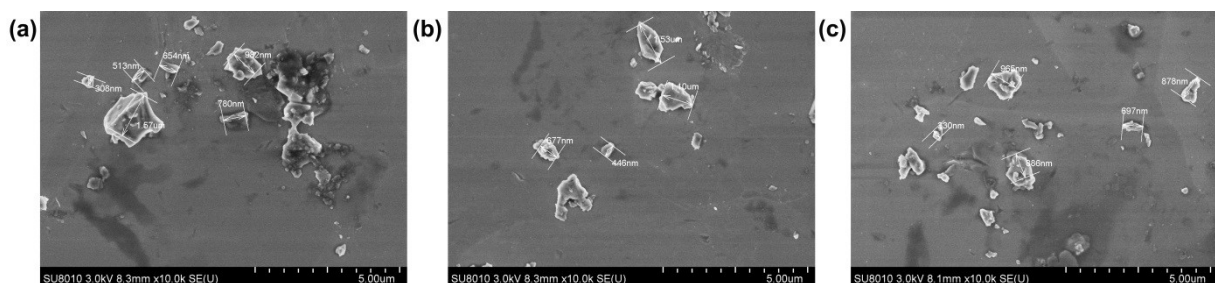

**Figure S13.** SEM images of  $V_1Mo_5$ ,  $V_8Mo_2$  and  $V_9Mo_1$ .

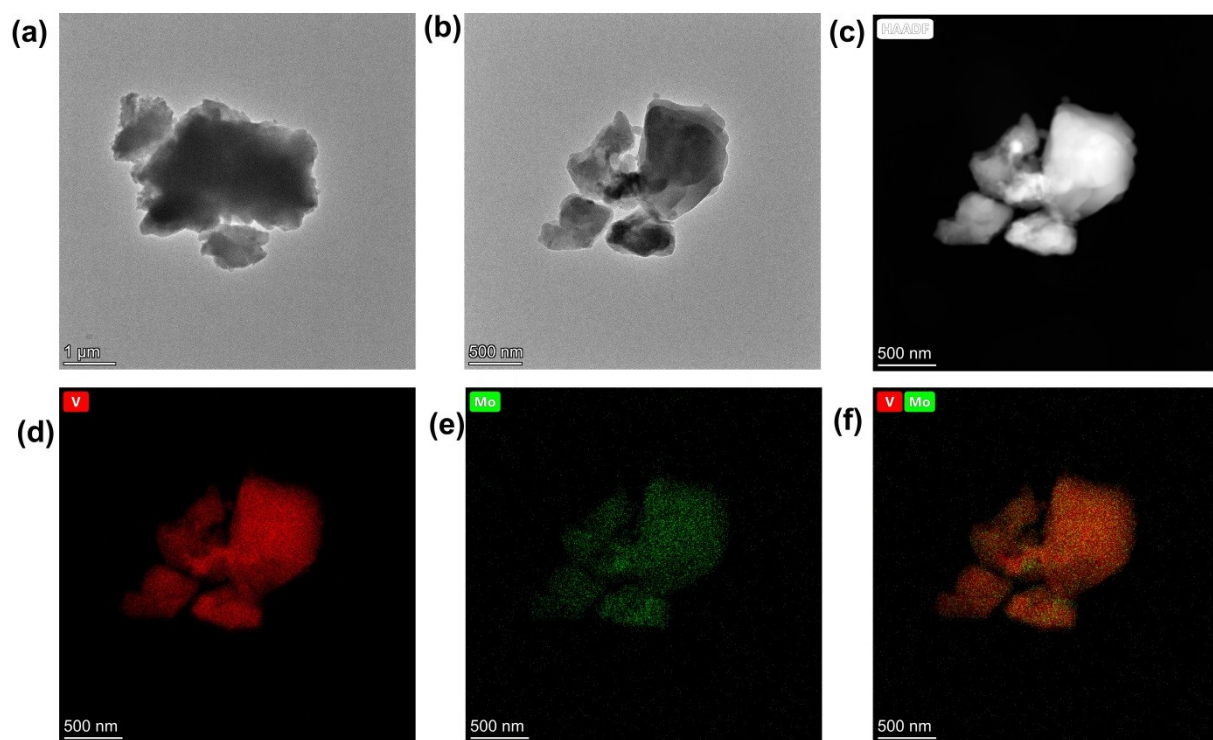

**Figure S14.** TEM images of  $V_8Mo_2$ : (a), (b) TEM images, (c) HAADF-STEM image; (d) Corresponding EDX mapping of V and Mo distribution; (f) composite of V/ Mo.



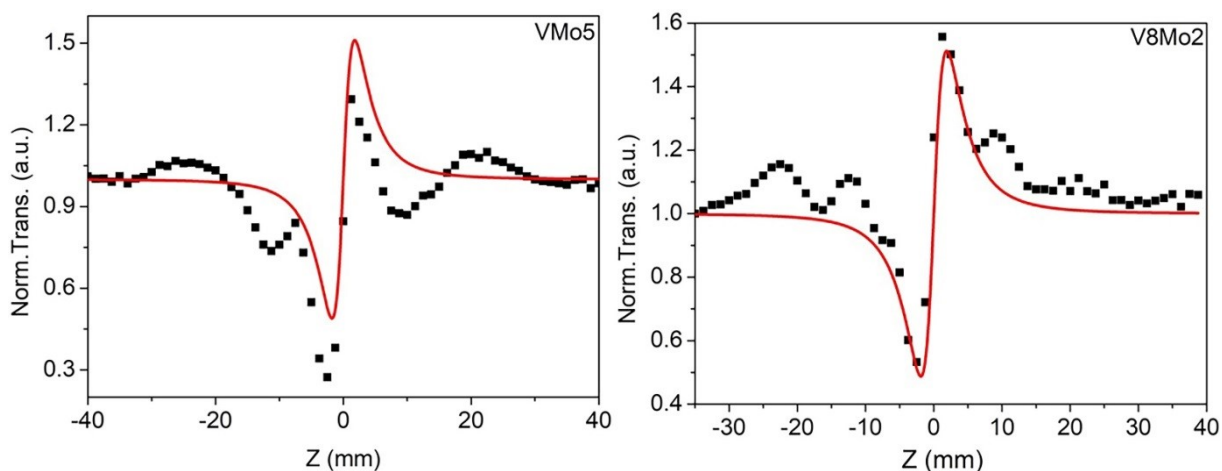

**Figure S15.** The closed-aperture Z-scan result of  $V_1Mo_5$  and  $V_8Mo_2$ .

**Table S10.** NLO coefficients of  $V_{10}$ ,  $V_1Mo_5$ ,  $V_8Mo_2$  and  $V_9Mo_1$  in propanetriol at the laser of 532 and 1064 nm.

| Compounds | $\lambda$ [nm] | $T_{min}$ | $\beta_{eff}$<br>[cm GW <sup>-1</sup> ] | Im $\chi(3)$<br>[esu] | $n_2$                 |
|-----------|----------------|-----------|-----------------------------------------|-----------------------|-----------------------|
| $V_1Mo_5$ | 532            | 0.75      | 60.16                                   | $2.9 \times 10^{-8}$  | $1.08 \times 10^{-5}$ |
| $V_8Mo_2$ |                | 0.50      | 123.79                                  | $6.0 \times 10^{-8}$  | $8.9 \times 10^{-6}$  |
| $V_9Mo_1$ |                | 0.06      | 691.79                                  | $3.3 \times 10^{-7}$  | $9.95 \times 10^{-6}$ |
| $V_{10}$  |                | 0.26      | 202.63                                  | $9.8 \times 10^{-8}$  |                       |
| $V_1Mo_5$ | 1064           | 0.85      | 80.19                                   | $7.8 \times 10^{-8}$  |                       |
| $V_8Mo_2$ |                | 0.53      | 127.98                                  | $1.24 \times 10^{-7}$ |                       |
| $V_9Mo_1$ |                | 0.22      | 292.52                                  | $2.8 \times 10^{-7}$  |                       |
| $V_{10}$  |                | 0.80      | 69.59                                   | $6.8 \times 10^{-8}$  |                       |

### Calculation Details of NLO Coefficients

The measured Z-scan curves were fitted using the following expressions: <sup>[3]</sup>

$$T(z) = 1 - \beta I_0 L_{eff} / [2\sqrt{2} \left(1 + \frac{z^2}{z_0^2}\right)] = 1 - [1 - T(z=0)] / \left(1 + \frac{z^2}{z_0^2}\right)$$

$$L_{eff} = [1 - \exp(-\alpha L)] / \alpha$$

Where  $\beta$  is nonlinear absorption coefficient,  $I_0$  is the energy density at the focus ( $z=0$ ),  $L_{eff}$  is the effective thickness of the sample;  $\alpha$  is the linear absorption coefficient and  $L$  is the thickness of sample. The equation of  $T$  can be fitted and calculated to get the  $\beta$  values.

The imaginary parts of the third order nonlinear optical susceptibility  $\chi^{(3)}$  are determined from the following equation: <sup>[4]</sup>

$$\text{Im } \chi^{(3)} = \frac{n_0^2 \epsilon_0 c \lambda \beta}{2\pi}$$

where  $n_0$  is the linear refractive index,  $\epsilon_0$  is the permittivity of free space,  $c$  is the speed of light,  $\lambda$  is the laser wavelength and  $\beta$  is nonlinear absorption coefficient.

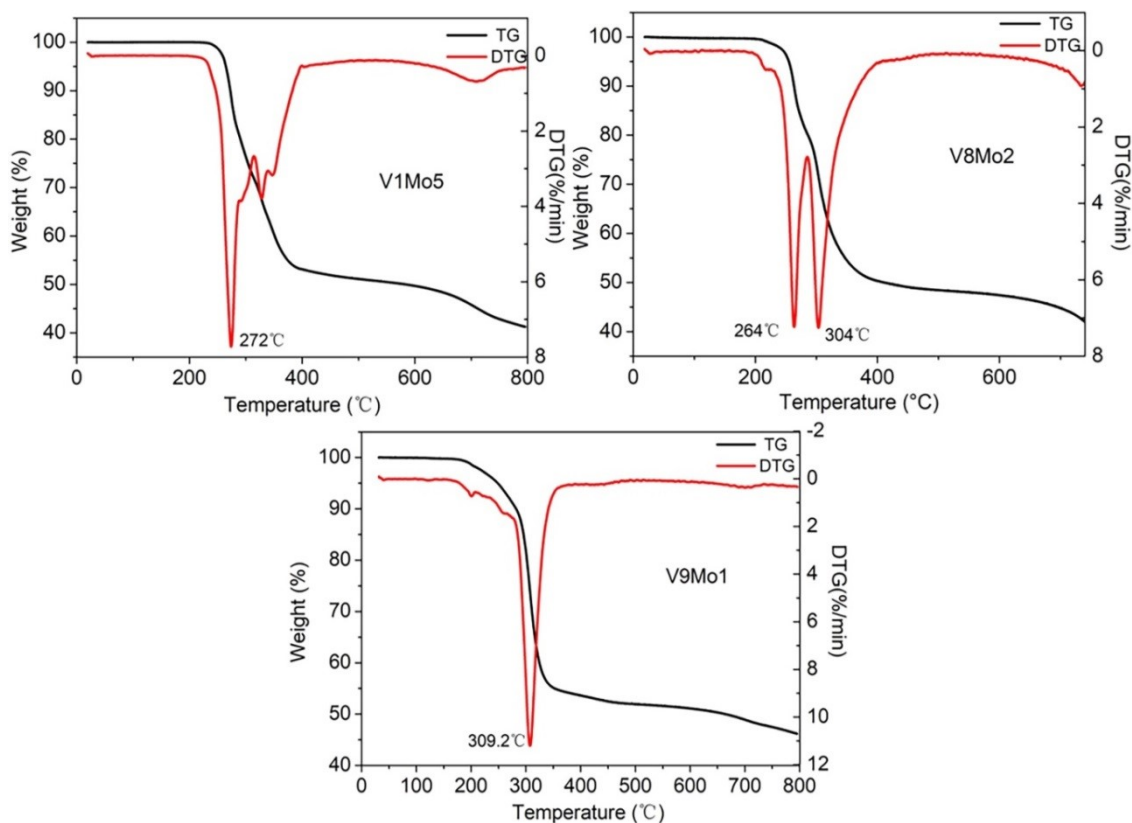

**Figure S17.** TG and DTG curves of  $V_1Mo_5$ ,  $V_8Mo_2$  and  $V_9Mo_1$ .

Thermo gravimetric analyzer (TGA) was applied to explore the thermal stability of  $V_1Mo_5$ ,  $V_8Mo_2$  and  $V_9Mo_1$  using the temperature rate of 10 °C/min at the  $N_2$  atmosphere. As shown in Fig S11,  $V_1Mo_5$  has a negligible weight loss of about 0.3% before 220°C. A rapid weight loss (46.6%) occurs between 220~390°C, which is corresponding to the loss of three TBA cations (46.2%).  $V_8Mo_2$  displays a very small weight loss ca. 0.9% before 217°C, which is less than the theoretical loss of two acetonitrile solvent molecules (3.8%) because  $V_8Mo_2$  is easy to lose its crystallized solvent molecules. A rapid weight loss (48.3%) is followed between 217~390°C, which is well matched with the loss of four TBA cations (48.1%). Compound **3** has a slow weight loss before 195 °C (ca. 0.09%), which is also less than the theoretical weight loss of two acetonitrile solvent molecules (3.99%), indicating that  $V_9Mo_1$  had lost two crystallized acetonitrile molecules before the TG test. A rapid weight loss (ca. 45.3%) associated with the loss of four TBA cation (47.2%) is found between 195 ~ 395 °C.

Ref:

- [1] Z. Xie, F. Wang, C. Y. Liu, *Adv Mater* **2012**, 24, 1716.
- [2] a) G. M. Sheldrick, University of Göttingen, Germany 1997; b) G. M. Sheldrick, University of Göttingen, Germany 1997; c) G. M. Sheldrick, *Acta. Crystallographica Section A Foundations of Crystallography* **2008**, 64, 112.
- [3] M. Sheik-bahae, A. A. Said, T.-h. Wei, E. W. V. Stryland, *IEEE J. Quantum Electron.* **1990**, 26, 760.
- [4] A. A. Said, M. Sheik-Bahae, D. J. Hagan, T. H. Wei, J. Wang, J. Young, E. W. V. Stryland, *J. Opt. Soc. Am. B: Opt. Phys.* **1992**, 9, 405.
